# Supplementary material
Source: publisher figshare collection journal article supplement (https://acs.figshare.com/ndownloader/files/4628602)
Supplement: Supplementary file 1 [file 4628602]

## Supporting Materials

### Cyclophane Capsule Motifs with Side Pockets

Sung Ok Kang, Victor W. Day and Kristin Bowman-James\*  
*Department of Chemistry, University of Kansas, Lawrence, Kansas 66045*  
E-mail: kbjames@ku.edu

### Synthesis:

**Triad 2.** A 3-neck round bottom flask equipped with two dropping funnels was filled with dry CH<sub>2</sub>Cl<sub>2</sub> (500 mL) under argon in a dry ice/acetone bath. The funnels were charged with 1,3,5-benzenetricarbonyl trichloride (1.00 g, 3.77 mmol) in CH<sub>2</sub>Cl<sub>2</sub> (150 mL), N'-methyl-2,2'-diaminodiethylamine (0.66 g, 5.65 mmol), and NEt<sub>3</sub> (1.58 mL, 11.3 mmol) in CH<sub>2</sub>Cl<sub>2</sub> (150 mL). The reagents in the two dropping funnels were added into the flask simultaneously at equal rates over 1 h and the reaction mixture was stirred for 24 h. The solvent was evaporated and the residue was redissolved in 300 mL of CH<sub>2</sub>Cl<sub>2</sub>. The organic phase was washed with saturated NaHCO<sub>3</sub> solution (200 mL), dried with Na<sub>2</sub>SO<sub>4</sub>, and concentrated. The crude product was purified by column chromatography (basic Al<sub>2</sub>O<sub>3</sub>, 3% MeOH in CH<sub>2</sub>Cl<sub>2</sub>) to give pure **2** (yield: 15 %). <sup>1</sup>H NMR (400 MHz, DMSO-*d*<sub>6</sub>, 23 °C, TMS): δ = 7.94 (br s, 6H, NH), 7.92 (s, 6H, ArH), 3.37 (q, *J* (H,H) = 4.5 Hz, 12H, CH<sub>2</sub>), 2.57 (t, *J* (H,H) = 4.5 Hz, 12H, CH<sub>2</sub>), 2.34 (s, 9H, CH<sub>3</sub>); <sup>13</sup>C NMR (400 MHz, DMSO-*d*<sub>6</sub>) δ 165.3 (C=O), 134.1, and 127.6 (Ar), 54.6, and 42.4 (CH<sub>2</sub>), 36.7 (CH<sub>3</sub>). FAB MS *m/z* 664.4 [MH]<sup>+</sup>.

**Tetrad 3-E and 3-S.** N'-Methyl-2,2'-diaminodiethylamine (0.72 g, 6.14 mmol) was added to a solution of tetramethyl 1,2,4,5-benzenetetracarboxylate (0.95 g, 3.07 mmol) in MeOH (110 mL). The reaction mixture was stirred under reflux condition for 5 days. After the reaction, the precipitates were removed by filtration and the filtrate was evaporated. This crude product was purified by column chromatography (neutral Al<sub>2</sub>O<sub>3</sub>, 5% MeOH in CH<sub>2</sub>Cl<sub>2</sub>) to give the pure isomers **3-E** and **3-S** (yield: 7% for each). **3-E:** <sup>1</sup>H NMR (400 MHz, DMSO-*d*<sub>6</sub>, 23 °C, TMS): δ = 7.94 (br s, 8H, NH), 7.21 (s, 4H, ArH), 3.36 (m, 8H, CH<sub>2</sub>), 3.25 (m, 8H, CH<sub>2</sub>), 2.56 (m, 8H, CH<sub>2</sub>), 2.45 (m, 8H, CH<sub>2</sub>), 2.22 (m, 12H, CH<sub>3</sub>); <sup>13</sup>C NMR (400 MHz, DMSO-*d*<sub>6</sub>) δ 167.2 (C=O), 135.8, and 126.5 (Ar), 55.6, and 41.1 (CH<sub>2</sub>), 36.7 (CH<sub>3</sub>). FAB MS *m/z* 833.5 [MH]<sup>+</sup>. **3-S:** <sup>1</sup>H NMR (400 MHz,

DMSO- $d_6$ , 23 °C, TMS):  $\delta$  = 8.35 (br s, 8H, NH), 7.20 (s, 4H, ArH), 3.69 (m, 8H, CH<sub>2</sub>), 2.90 (m, 8H, CH<sub>2</sub>), 2.64 (m, 8H, CH<sub>2</sub>), 2.48 (m, 8H, CH<sub>2</sub>), 2.28 (m, 12H, CH<sub>3</sub>); <sup>13</sup>C NMR (400 MHz, DMSO- $d_6$ )  $\delta$  167.6 (C=O), 136.7, and 127.4 (Ar), 55.1, and 41.2 (CH<sub>2</sub>), 36.7 (CH<sub>3</sub>). FAB MS  $m/z$  833.5 [MH]<sup>+</sup>.

#### **NMR studies:**

<sup>1</sup>H NMR spectra were recorded on a Bruker Avance 400 spectrometer at 400 MHz. Each titration was performed by 20 measurements in DMSO- $d_6$  at room temperature. Aliquots from a stock solution of the  $n\text{Bu}_4\text{N}^+$  salts (20 mM) were gradually added to the initial solution of ligand (2 mM). Up to ten anion equivalents were added during the titrations. All proton signals were referenced to a TMS standard. The association constants  $K$  were calculated by EQNMR. All titration curves fit best in 1:1 or 1:2 binding modes of the ligand to anions.

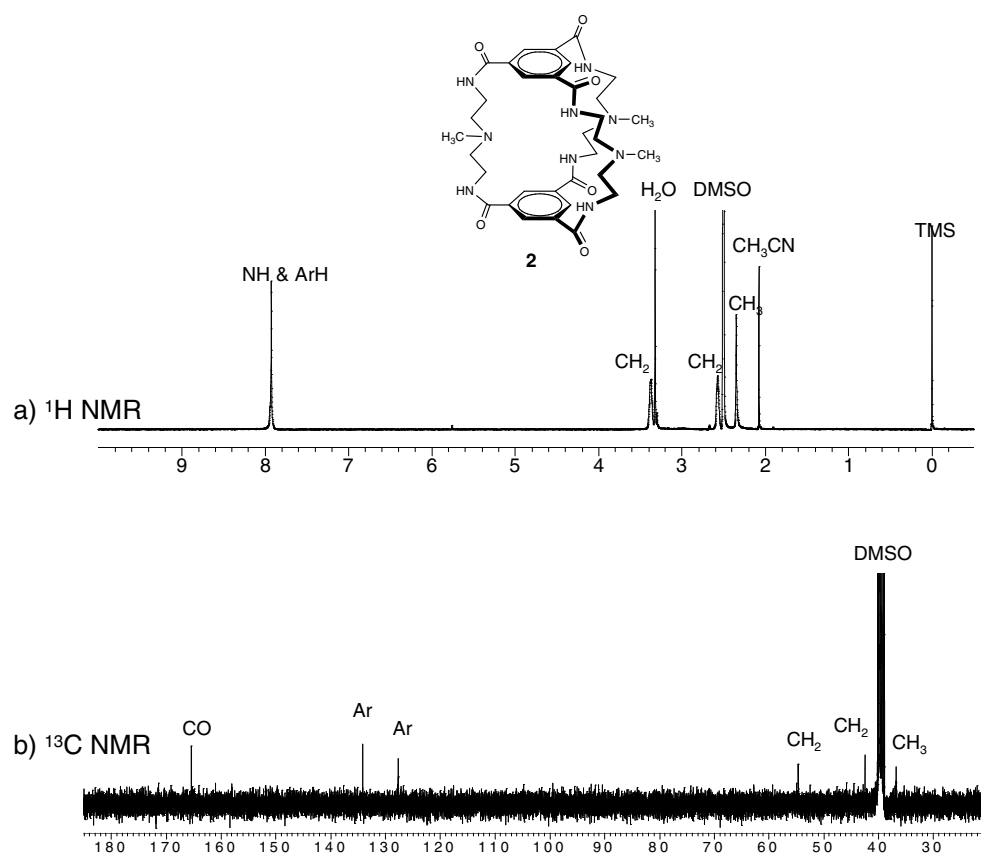

**Figure S1.**  $^1\text{H}$  and  $^{13}\text{C}$  NMR spectra of **2** in  $\text{DMSO}-d_6$ .

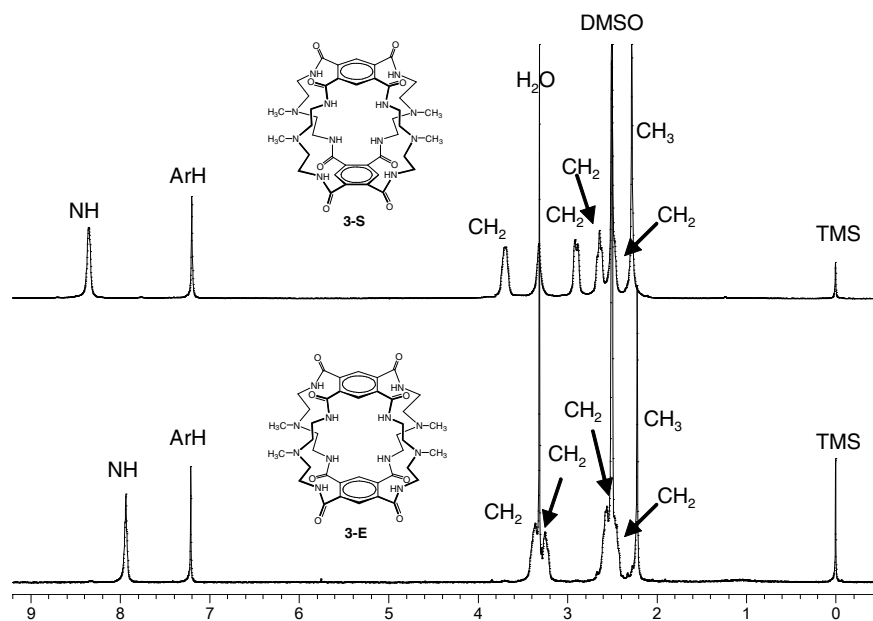

**A**

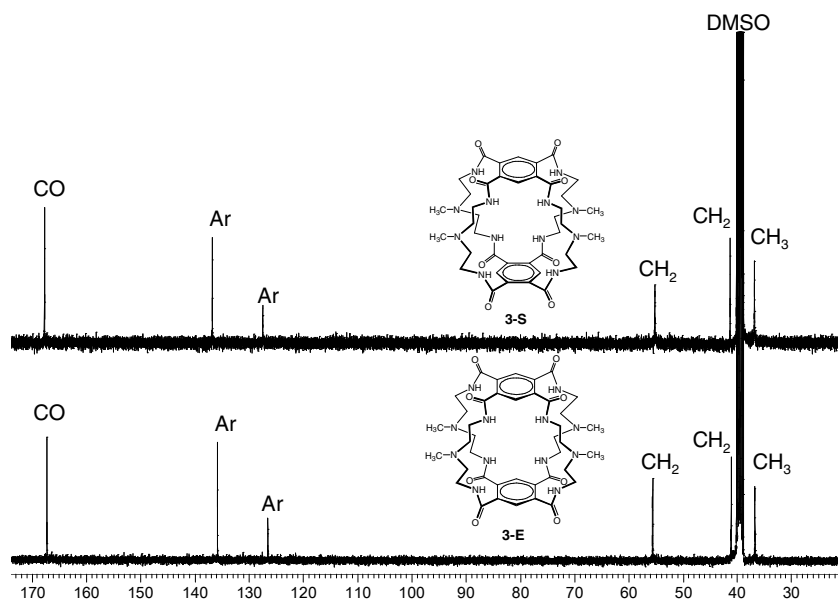

**B**

**Figure S2.** (A)  $^1\text{H}$  NMR and (B)  $^{13}\text{C}$  NMR spectra of the 3-E and 3-S isomers in  $\text{DMSO}-d_6$ .



ERROR: invalidrestore  
OFFENDING COMMAND: --restore--

STACK:

-savelevel-

17764

(~d)

(~d)

17763

(~c)

(~c)

17762

(~b)

(~b)

17761

(~a)

(~a)

17760

(~')

(~')

17759

(~\_)

(~\_)

17758

(~^)

(~^)

17757

(~])

(~])

17756

(~\)

(~\)

17755

(~[)

(~[)

17754

(~Z)

(~Z)

17753

(~Y)

(~Y)

17752

(~X)

(~X)

17751

(~W)

(~W)

17750

(~V)

(~V)

17749

(~U)

(~U)

17748

(~T)

(~T)

17747

(~S)

(~S)

17746

(~R)

(~R)

17745

(~Q)

(~Q)

17744

(~P)

(~P)

17743

(~O)

(~O)

17742
